# Supplementary material for: Human NOD2 Recognizes Structurally Unique Muramyl Dipeptides from Mycobacterium leprae
Source: PubMed Central journal article supplement (PMC4995902; doi:10.1128/iai.00334-16), 2016-08-19
Supplement: IAI.00334-16_zii999091788so1.pdf [file IAI.00334-16_zii999091788so1.pdf]

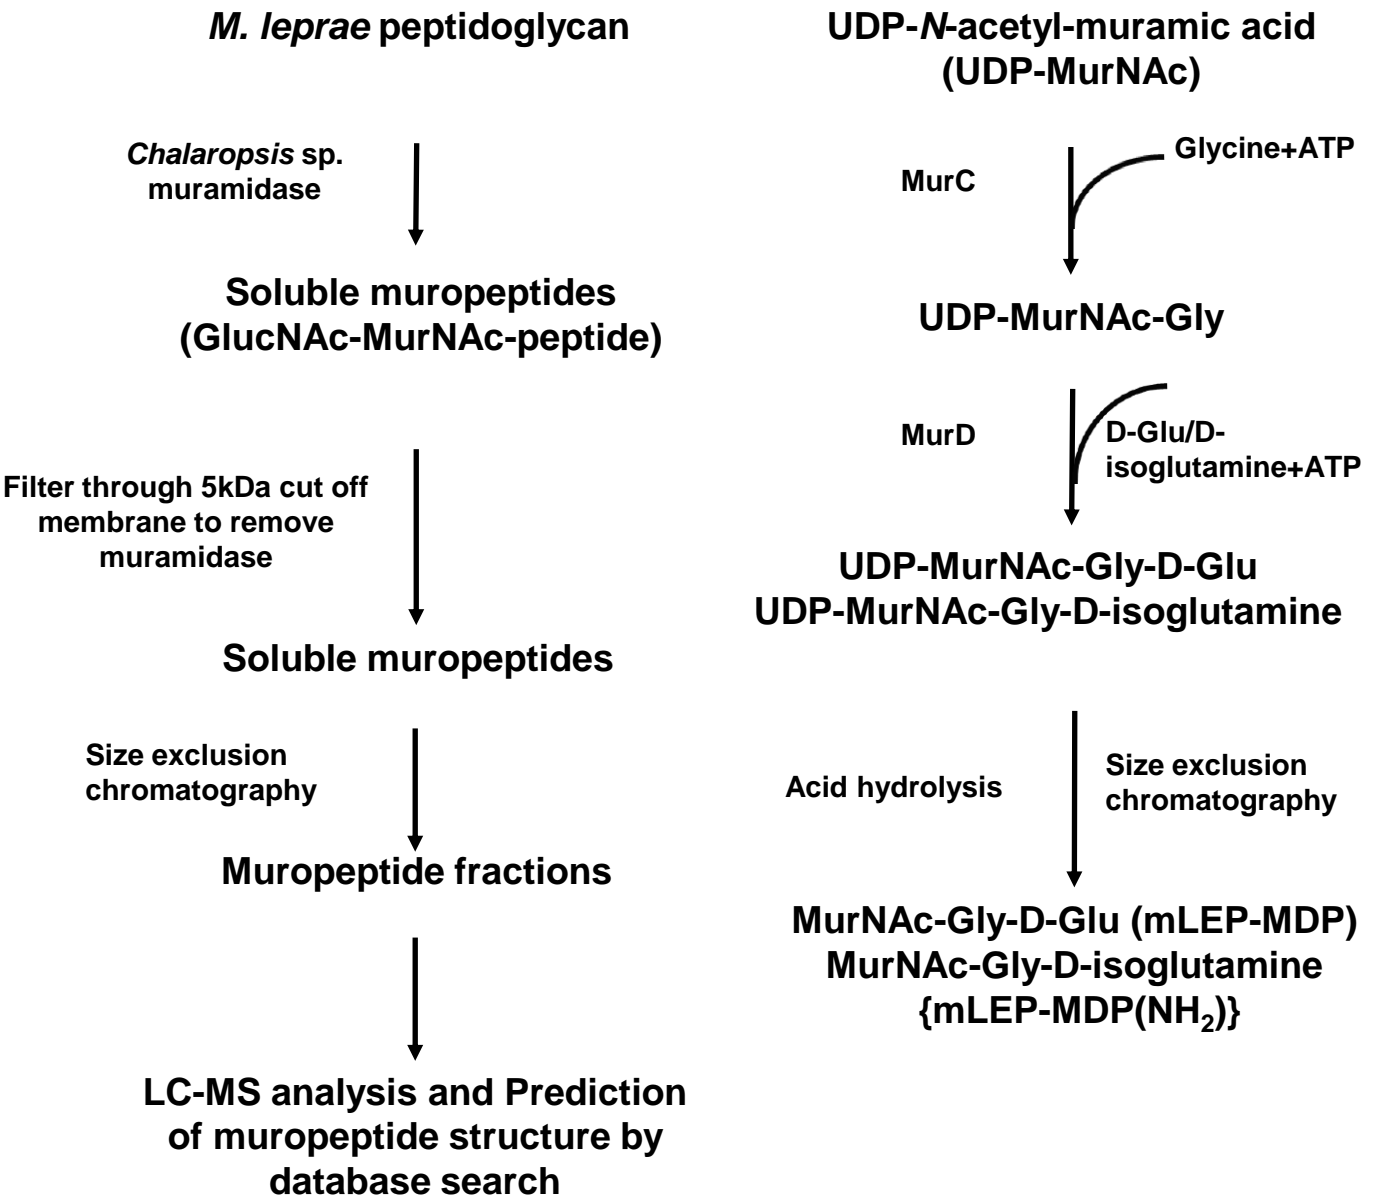

**FIG S1** Preparation of natural and synthetic NOD2 ligands of *M. leprae*. A flowchart showing the steps to prepare the muropeptide fractions from *M. leprae* and the synthetic MDP variants (A). Amino acid composition analysis of syn-MDP, mLEP-MDP and mLEP-MDP(NH<sub>2</sub>) by GC-MS (B).

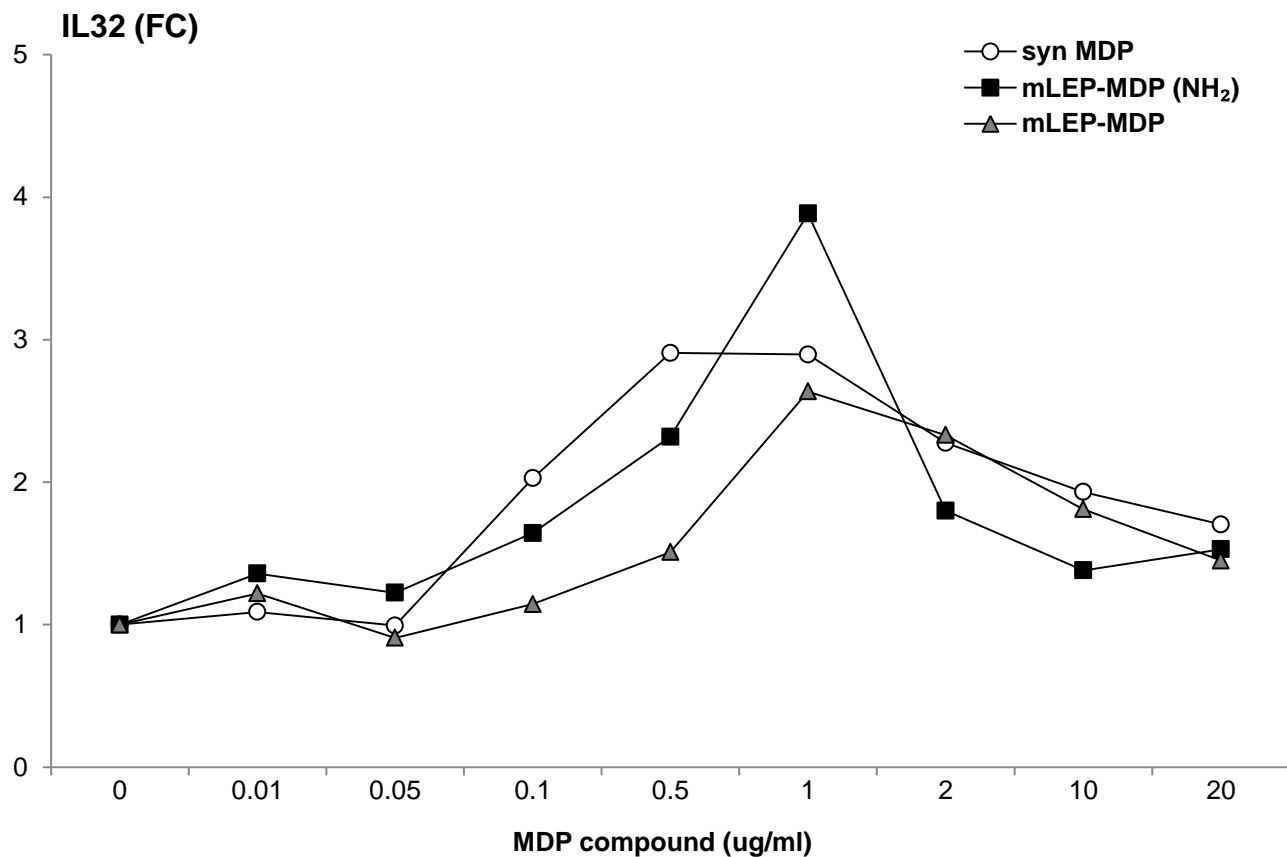

**FIG S2** Titration of structural different MDP for IL32 induction. Purified human monocytes were activated using syn-MDP, mLEP-MDP( $\text{NH}_2$ ) and mLEP-MDP and IL32 gene induction was quantified by PCR. A representative histogram is shown.
